# Supplementary material
Source: Springer Nature journal article supplement (https://www.springermedizin.de/resource/supplementary/12936_2012_2566_MOESM3_ESM.pdf/9543192)

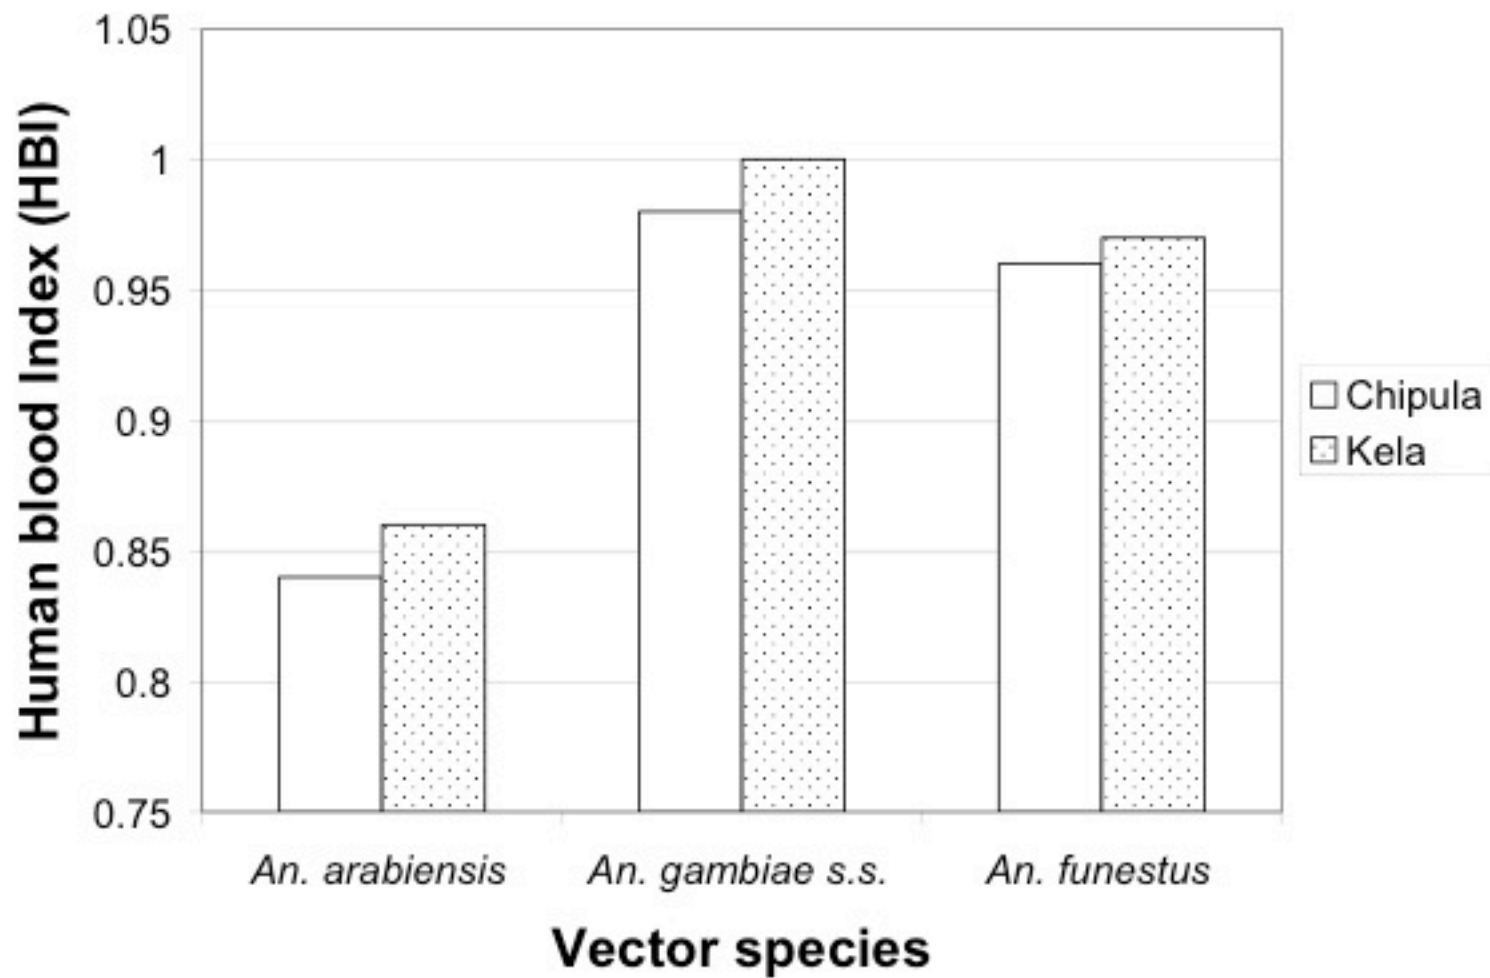

Supplement: MOESM3 [file 9543192]
